# Supplementary material for: LC-MS/MS signal enhancement for estrogenic hormones in water samples using experimental design
Source: Royal Society of Chemistry journal article supplement (doi:10.1039/c6ra06526k), 2016-01-01
Supplement: c6ra06526k1.pdf [file c6ra06526k1.pdf]

### Supplementary Material

S-1. Coded and experimental points of Box-Behnken design.

| Run Number | Coded Variables |                |                | Actual Variables  |                   |                                   |
|------------|-----------------|----------------|----------------|-------------------|-------------------|-----------------------------------|
| STD        | X <sub>1</sub>  | X <sub>2</sub> | X <sub>3</sub> | %ACN <sub>s</sub> | %ACN <sub>m</sub> | Flow Rate (μL min <sup>-1</sup> ) |
| 1          | +1              | -1             | 0              | 28                | 44                | 150                               |
| 2          | 0               | -1             | -1             | 25                | 44                | 100                               |
| 3          | -1              | -1             | 0              | 22                | 44                | 150                               |
| 4          | 0               | -1             | +1             | 25                | 44                | 200                               |
| 5          | +1              | 0              | +1             | 28                | 47                | 200                               |
| 6          | -1              | 0              | +1             | 22                | 47                | 200                               |
| 7          | -1              | 0              | -1             | 22                | 47                | 100                               |
| 8          | +1              | 0              | -1             | 28                | 47                | 100                               |
| 9          | 0               | +1             | 0              | 22                | 50                | 150                               |
| 10         | 0               | +1             | +1             | 25                | 50                | 200                               |
| 11         | +1              | +1             | 0              | 28                | 50                | 150                               |
| 12         | 0               | +1             | -1             | 25                | 50                | 100                               |
| C-1        | 0               | 0              | 0              | 25                | 47                | 150                               |
| C-2        | 0               | 0              | 0              | 25                | 47                | 150                               |
| C-3        | 0               | 0              | 0              | 25                | 47                | 150                               |
| C-4        | 0               | 0              | 0              | 25                | 47                | 150                               |
| C-5        | 0               | 0              | 0              | 25                | 47                | 150                               |

S-2. Factor levels for Box Behnken design for each factor

| Factors     | Low level<br>(-1) | Center point<br>(0) | High Level<br>(+1) |
|-------------|-------------------|---------------------|--------------------|
| SGP (Arb)   | 33                | 35                  | 38                 |
| ISGP (Arb)  | 0                 | 1                   | 2                  |
| AGP (Arb)   | 10                | 15                  | 20                 |
| CT (°C)     | 250               | 300                 | 350                |
| VT (°C)     | 325               | 375                 | 425                |
| CGP (mTorr) | 1.5               | 2.0                 | 2.5                |
| SV (V)      | 2500              | 2750                | 3000               |

S-3. Box Behnken Experimental Design for optimization of LC-MS/MS operating conditions.

| <b>Run Number</b> | <b>SGP (Arb)</b> | <b>ISGP (Arb)</b> | <b>AGP (Arb)</b> | <b>CT (°C)</b> | <b>VT (°C)</b> | <b>CGP (Arb)</b> | <b>SV (V)</b> |
|-------------------|------------------|-------------------|------------------|----------------|----------------|------------------|---------------|
| 1                 | 35               | 1                 | 10               | 350            | 375            | 2                | 2500          |
| 2                 | 32               | 2                 | 15               | 350            | 375            | 2                | 2750          |
| 3                 | 35               | 1                 | 10               | 350            | 375            | 2                | 3000          |
| 4                 | 35               | 1                 | 15               | 250            | 325            | 1.5              | 2750          |
| 5                 | 35               | 1                 | 20               | 250            | 375            | 2                | 3000          |
| 6                 | 35               | 0                 | 20               | 300            | 375            | 2.5              | 2750          |
| 7                 | 35               | 1                 | 15               | 250            | 325            | 2.5              | 2750          |
| 8                 | 35               | 0                 | 10               | 300            | 375            | 2.5              | 2750          |
| 9                 | 38               | 1                 | 15               | 300            | 375            | 2.5              | 3000          |
| 10                | 32               | 1                 | 15               | 300            | 375            | 2.5              | 3000          |
| 11                | 35               | 0                 | 15               | 300            | 425            | 2                | 3000          |
| 12                | 38               | 1                 | 20               | 300            | 325            | 2                | 2750          |
| 13                | 35               | 1                 | 20               | 350            | 375            | 2                | 3000          |
| 14                | 35               | 0                 | 20               | 300            | 375            | 1.5              | 2750          |
| 15                | 32               | 1                 | 10               | 300            | 325            | 2                | 2750          |
| 16                | 32               | 0                 | 15               | 250            | 375            | 2                | 2750          |
| 17                | 32               | 2                 | 15               | 250            | 375            | 2                | 2750          |
| 18                | 35               | 1                 | 15               | 250            | 425            | 2.5              | 2750          |
| 19                | 32               | 1                 | 20               | 300            | 325            | 2                | 2750          |
| 20                | 38               | 2                 | 15               | 250            | 375            | 2                | 2750          |
| 21                | 38               | 1                 | 15               | 300            | 375            | 1.5              | 3000          |
| 22                | 35               | 0                 | 10               | 300            | 375            | 1.5              | 2750          |
| 23                | 35               | 1                 | 20               | 250            | 375            | 2                | 2500          |
| 24                | 35               | 1                 | 10               | 250            | 375            | 2                | 3000          |
| 25                | 35               | 1                 | 15               | 250            | 425            | 1.5              | 2750          |
| 26                | 35               | 1                 | 15               | 350            | 325            | 1.5              | 2750          |
| 27                | 32               | 1                 | 15               | 300            | 375            | 2.5              | 2500          |
| 28                | 32               | 0                 | 15               | 350            | 375            | 2                | 2750          |
| 29                | 38               | 1                 | 10               | 300            | 425            | 2                | 2750          |
| 30                | 35               | 2                 | 15               | 300            | 325            | 2                | 2500          |
| 31                | 32               | 1                 | 20               | 300            | 425            | 2                | 2750          |
| 32                | 38               | 1                 | 10               | 300            | 325            | 2                | 2750          |
| 33                | 35               | 1                 | 15               | 350            | 425            | 1.5              | 2750          |
| 34                | 38               | 0                 | 15               | 350            | 375            | 2                | 2750          |
| 35                | 38               | 1                 | 15               | 300            | 375            | 1.5              | 2500          |
| 36                | 35               | 2                 | 10               | 300            | 375            | 1.5              | 2750          |
| 37                | 35               | 1                 | 15               | 350            | 325            | 2.5              | 2750          |
| 38                | 35               | 1                 | 20               | 350            | 375            | 2                | 2500          |
| 39                | 38               | 1                 | 15               | 300            | 375            | 2.5              | 2500          |
| 40                | 35               | 2                 | 15               | 300            | 425            | 2                | 3000          |

|     |    |   |    |     |     |     |      |
|-----|----|---|----|-----|-----|-----|------|
| 41  | 35 | 2 | 15 | 300 | 325 | 2   | 3000 |
| 42  | 38 | 1 | 20 | 300 | 425 | 2   | 2750 |
| 43  | 35 | 2 | 15 | 300 | 425 | 2   | 2500 |
| 44  | 35 | 2 | 20 | 300 | 375 | 2.5 | 2750 |
| 45  | 38 | 2 | 15 | 350 | 375 | 2   | 2750 |
| 46  | 32 | 1 | 10 | 300 | 425 | 2   | 2750 |
| 47  | 32 | 1 | 15 | 300 | 375 | 1.5 | 3000 |
| 48  | 35 | 0 | 15 | 300 | 325 | 2   | 3000 |
| 49  | 32 | 1 | 15 | 300 | 375 | 1.5 | 2500 |
| 50  | 38 | 0 | 15 | 250 | 375 | 2   | 2750 |
| 51  | 35 | 2 | 10 | 300 | 375 | 2.5 | 2750 |
| 52  | 35 | 0 | 15 | 300 | 325 | 2   | 2500 |
| 53  | 35 | 1 | 10 | 250 | 375 | 2   | 2500 |
| 54  | 35 | 0 | 15 | 300 | 425 | 2   | 2500 |
| 55  | 35 | 2 | 20 | 300 | 375 | 1.5 | 2750 |
| 56  | 35 | 1 | 15 | 350 | 425 | 2.5 | 2750 |
| C1* | 35 | 1 | 15 | 300 | 375 | 2   | 2750 |
| C2* | 35 | 1 | 15 | 300 | 375 | 2   | 2750 |
| C3* | 35 | 1 | 15 | 300 | 375 | 2   | 2750 |
| C4* | 35 | 1 | 15 | 300 | 375 | 2   | 2750 |
| C5* | 35 | 1 | 15 | 300 | 375 | 2   | 2750 |
| C6* | 35 | 1 | 15 | 300 | 375 | 2   | 2750 |

---

\*C: centre point

## S-4 Regression analysis and quadratic equations for different hormones

### for peak symmetry (PS)

$$Y_{PSE1} = - 246.26 + 15.46322X_1 + 6.201013X_2 - 0.155584X_3 - 0.324824X_1X_2 - 0.01002X_1X_3 - 0.00012X_2X_3 - 0.29722X_1^2 - 0.02204 X_2^2 - 5.9.10^{-6}X_3^2 + 0.006328X_1^2X_2 + 0.000168X_1^2X_3 \quad \text{Eq.2}$$

$$Y_{PSE2} = - 492.878 + 47.50023X_1 + 10.7824X_2 - 0.71428X_3 - 1.18659X_1X_2 + 0.053843X_1X_3 + 0.001263X_2X_3 - 0.95077X_1^2 + 0.040647 X_2^2 - 3.2.10^{-6}X_3^2 + 0.023717X_1^2X_2 + -0.00107X_1^2X_3 \quad \text{Eq 3}$$

$$Y_{PSE3} = - 441.752 + 36.10214X_1 + 10.13496X_2 - 0.05877X_3 - 0.82847X_1X_2 + 0.011562X_1X_3 - 0.00124X_2X_3 - 0.73982X_1^2 - 0.0008 X_2^2 - 7.7.10^{-6}X_3^2 + 0.017091X_1^2X_2 + - 0.00027X_1^2X_3 \quad \text{Eq.4}$$

$$Y_{PSEE2} = - 141.667 + 18.38937X_1 - 0.5126X_2 + 0.498594X_3 - 0.24048X_1X_2 - 0.04091X_1X_3 - 0.00028X_2X_3 - 0.39681X_1^2 + 0.036328 X_2^2 - 0.000112X_3^2 + 0.004887X_1^2X_2 + 0.000807X_1^2X_3 \quad \text{Eq.5}$$

S-5. Observed and predicted values of peak symmetries and resolution factors of hormones.

| Run No: | X <sub>1</sub> | X <sub>2</sub> | X <sub>3</sub> | Peak Symmetry |           |          |           |          |           |          |           | Resolution factor |           |          |           |          |           |
|---------|----------------|----------------|----------------|---------------|-----------|----------|-----------|----------|-----------|----------|-----------|-------------------|-----------|----------|-----------|----------|-----------|
|         |                |                |                | E1            |           | E2       |           | E3       |           | EE2      |           | E3                |           | E2       |           | EE2      |           |
|         |                |                |                | Observed      | Predicted | Observed | Predicted | Observed | Predicted | Observed | Predicted | Observed          | Predicted | Observed | Predicted | Observed | Predicted |
| 1       | 22             | 44             | 150            | 2.24          | 2.12      | 2.00     | 1.82      | 2.10     | 2.08      | 2.00     | 2.04      | 3.95              | 3.80      | 1.09     | 1.08      | 0.39     | 0.47      |
| 2       | 28             | 44             | 150            | 1.91          | 2.03      | 1.41     | 1.59      | 1.79     | 1.80      | 2.00     | 1.96      | 3.73              | 3.70      | 1.29     | 1.21      | 0.59     | 0.53      |
| 3       | 22             | 50             | 150            | 2.41          | 2.29      | 3.00     | 2.82      | 1.62     | 1.60      | 1.61     | 1.65      | 2.70              | 2.72      | 0.62     | 0.69      | 0.48     | 0.53      |
| 4       | 28             | 50             | 150            | 1.78          | 1.90      | 2.38     | 2.56      | 2.25     | 2.26      | 1.75     | 1.71      | 2.05              | 2.20      | 0.57     | 0.57      | 0.54     | 0.47      |
| 5       | 22             | 47             | 100            | 1.82          | 1.94      | 1.65     | 1.83      | 1.64     | 1.65      | 1.36     | 1.31      | 4.05              | 4.24      | 1.08     | 1.07      | 0.59     | 0.56      |
| 6       | 28             | 47             | 100            | 2.32          | 2.20      | 1.69     | 1.51      | 2.46     | 2.45      | 1.42     | 1.46      | 3.07              | 3.14      | 0.93     | 0.99      | 0.45     | 0.54      |
| 7       | 22             | 47             | 200            | 2.71          | 2.83      | 1.75     | 1.93      | 2.00     | 2.01      | 2.33     | 2.29      | 2.50              | 2.43      | 0.74     | 0.70      | 0.51     | 0.41      |
| 8       | 28             | 47             | 200            | 2.22          | 2.10      | 1.92     | 1.75      | 1.60     | 1.59      | 2.06     | 2.11      | 3.10              | 2.91      | 0.78     | 0.80      | 0.39     | 0.43      |
| 9       | 25             | 44             | 100            | 1.86          | 1.86      | 1.86     | 1.86      | 2.00     | 2.00      | 2.50     | 2.50      | 4.50              | 4.46      | 1.25     | 1.30      | 0.75     | 0.71      |
| 10      | 25             | 50             | 100            | 1.58          | 1.58      | 1.19     | 1.19      | 1.44     | 1.44      | 2.00     | 2.00      | 3.05              | 2.83      | 0.79     | 0.77      | 0.65     | 0.63      |
| 11      | 25             | 44             | 200            | 2.14          | 2.14      | 2.62     | 2.62      | 2.36     | 2.36      | 2.67     | 2.67      | 2.90              | 3.11      | 0.91     | 1.00      | 0.49     | 0.51      |
| 12      | 25             | 50             | 200            | 1.79          | 1.79      | 2.70     | 2.70      | 1.06     | 1.06      | 2.00     | 2.00      | 2.11              | 2.15      | 0.47     | 0.49      | 0.53     | 0.57      |
| C1      | 25             | 47             | 150            | 1.64          | 2.06      | 1.85     | 1.81      | 1.74     | 1.74      | 1.80     | 1.68      | 3.93              | 3.53      | 0.88     | 0.89      | 0.46     | 0.54      |
| C2      | 25             | 47             | 150            | 2.59          | 2.06      | 1.71     | 1.81      | 1.82     | 1.74      | 1.93     | 1.68      | 3.70              | 3.53      | 1.03     | 0.89      | 0.57     | 0.54      |
| C3      | 25             | 47             | 150            | 1.92          | 2.06      | 1.94     | 1.81      | 1.86     | 1.74      | 1.32     | 1.68      | 3.21              | 3.53      | 0.72     | 0.89      | 0.54     | 0.54      |
| C4      | 25             | 47             | 150            | 1.92          | 2.06      | 1.94     | 1.81      | 1.57     | 1.74      | 1.69     | 1.68      | 3.47              | 3.53      | 1.08     | 0.89      | 0.52     | 0.54      |
| C5      | 25             | 47             | 150            | 2.21          | 2.06      | 1.59     | 1.81      | 1.73     | 1.74      | 1.68     | 1.68      | 3.33              | 3.53      | 0.89     | 0.89      | 0.63     | 0.54      |
| SRD     |                |                |                | 4             | 12        | 10       | 35        | 9        | 8         | 7        | 12        | 10                | 13        | 5        | 11        | 18       | 40        |

## S-6 Regression analysis and quadratic equations for different hormones

### for resolution factor (RF)

$$Y_{RFE2} = -1.07978 + 0.26869X_1 + 0.075353X_2 - 0.01237X_3 - 0.00669X_1X_2 + 0.000316X_1X_3 + 3.47 \cdot 10^{-5} X_2X_3 \quad \text{Eq. 6}$$

$$Y_{RFE3} = -51.3902 + 0.26869X_1 + 2.339036X_2 - 0.10904X_3 - 0.01194X_1X_2 + 0.002635X_1X_3 + 0.001107X_2X_3 - 0.02107X_1^2 - 0.02577X_2^2 - 6.3 \cdot 10^{-5}X_3^2 \quad \text{Eq. 7}$$

$$Y_{RFE2} = 2.170366 + 0.616001X_1 - 0.34164X_2 - 0.01582X_3 - 0.0036X_1X_2 + 4.67 \cdot 10^{-5}X_1X_3 + 0.000226X_2X_3 - 0.00907X_1^2 - 0.004225X_2^2 - 9.09 \cdot 10^{-6}X_3^2 \quad \text{Eq. 8}$$

S-7. Observed and predicted values of resolution factor and peak symmetry

at the experimental points, which are different than design points.

| Response | %ACN <sub>s</sub> : 25              |           | %ACN <sub>s</sub> : 25              |           |
|----------|-------------------------------------|-----------|-------------------------------------|-----------|
|          | %ACN <sub>m</sub> : 48              |           | %ACN <sub>m</sub> : 44              |           |
|          | Flow rate: 145 μL min <sup>-1</sup> |           | Flow rate: 175 μL min <sup>-1</sup> |           |
|          | Observed                            | Predicted | Observed                            | Predicted |
| RF E3    | 3.16                                | 3.33      | 3.05                                | 3.57      |
| RF E2    | 0.717                               | 0.817     | 1.00                                | 1.08      |
| RF EE2   | 0.521                               | 0.552     | 0.588                               | 0.540     |
| PS E1    | 1.94                                | 1.97      | 2.06                                | 2.084     |
| PS E2    | 1.85                                | 1.73      | 1.93                                | 2.49      |
| PS E3    | 1.62                                | 1.59      | 2.67                                | 2.29      |
| PS EE2   | 1.45                                | 1.62      | 2.36                                | 2.41      |



### S-8 Regression analysis and quadratic equations for different hormones for peak area

$$Y_{IAE1} = 172463.6 + 2696.783X_1 - 5943.64X_2 + 1313.332X_3 - 20611.1X_4 - 63301.3 X_5 - 1278.89X_6 - 10495X_7 + 3123.884 X_1X_2 + 22051.21X_1X_3 + 252.3905X_1X_4 + 18513.91 X_1X_5 - 535.769 X_1X_6 + 1921.665 X_1X_7 - 324.297 X_2X_3 - 4448.24 X_2X_4 + 2913.445 X_2X_5 - 1160.33 X_2X_6 + 2342.146 X_2X_7 + 2240.425 X_3X_4 + 15702.7 X_3X_5 - 3881.99 X_3X_6 - 2076.36 X_3X_7 + 12118.37 X_4X_5 + 3311.824 X_4X_6 + 8374.847 X_4X_7 + 1435.664 X_5X_6 - 2806 X_5X_7 + 2618.567 X_6X_7 + 6011.336 X_1^2 - 971.644 X_2^2 - 93.3027X_3^2 - 13418X_4^2 - 64789.2 X_5^2 - 12216.1 X_6^2 - 25650.7 X_7^2$$

**Eq.9**

$$Y_{IAE2} = 42673.08 + 1496.183X_1 - 3189.39X_2 - 279.06X_3 - 9877.67X_4 - 17206.5X_5 - 1851.56X_6 - 3949.05X_7 + 367.206X_1X_2 + 4768.905X_1X_3 + 386.5508X_1X_4 + 4094.343X_1X_5 + 308.2959X_1X_6 - 704.53X_1X_7 - 813.049X_2X_3 - 616.791X_2X_4 + 2146.758X_2X_5 + 1336.474X_2X_6 + 543.0506X_2X_7 - 129.756X_3X_4 + 5787.002X_3X_5 - 1.0186X_3X_6 - 723.366X_3X_7 + 5664.571X_4X_5 - 1.3249X_4X_6 + 3739.379X_4X_7 + 687.1358X_5X_6 + 1122.957X_5X_7 + 1278.819X_6X_7 + 974.9913X_1^2 + 854.6614X_2^2 + 309.9898X_3^2 - 3054.52X_4^2 - 16137.7X_5^2 - 2746.48X_6^2 - 6714.027X_7^2$$

**Eq.10**

$$Y_{IAE3} = 75588.75 + 1969.335X_1 - 3706X_2 + 289.9176X_3 - 5215.27X_4 - 27668.8X_5 - 1267.68X_6 - 5276.8X_7 + 265.28 X_1X_2 + 8073.63X_1X_3 + 2165.158X_1X_4 + 6921.138X_1X_5 + 1576.173X_1X_6 + 3019.263X_1X_7 - 2415.97 X_2X_3 - 1449.26X_2X_4 - 722.698X_2X_5 + 2584.524X_2X_6 + 1860.682X_2X_7 + 725.704X_3X_4 + 5086.341X_3X_5 - 297.02X_3X_6 + 363.4076X_3X_7 + 2492.89X_4X_5 + 63.2076X_4X_6 + 2718.584X_4X_7 + 1705.947X_5X_6 - 789.546X_5X_7 + 430.395X_6X_7 + 3019.214X_1^2 - 176.116X_2^2 - 383.987X_3^2 - 5945.89X_4^2 - 28368.1X_5^2 - 5241.74X_6^2 - 12386.7X_7^2$$

**Eq.11**

$$Y_{IAEE2} = 26534.69 + 370.2664X_1 - 2019.15X_2 - 98.3677X_3 - 4739.28X_4 - 10228X_5 - 787.092X_6 - 2635.8X_7 + 2527.171X_1X_2 + 1524.091X_1X_3 - 310.661X_1X_4 + 4104.024X_1X_5 + 526.8978X_1X_6 + 1095.008X_1X_7 - 52.0269X_2X_3 + 148.2908X_2X_4 + 1573.113X_2X_5 - 578.253X_2X_6 + 1985.744X_2X_7 + 407.2529X_3X_4 + 2979.356X_3X_5 - 1492.05X_3X_6 + 495.9503X_3X_7 + 2598.758X_4X_5 + 297.5233X_4X_6 + 1212.984X_4X_7 + 1072.538X_5X_6 + 814.9745X_5X_7 - 779.864X_6X_7 + 450.7009X_1^2 + 1199.041X_2^2 - 577.002X_3^2 - 2007.78X_4^2 - 10214.5X_5^2 - 2774.85X_6^2 - 5172.58X_7^2$$

**Eq.12**

S-9. Observed and predicted integration areas of hormones at several experimental conditions for LC-MS/MS conditions

| Run number     | EE2      |           | E2       |           | E3       |           | E1       |           |
|----------------|----------|-----------|----------|-----------|----------|-----------|----------|-----------|
|                | Observed | Predicted | Observed | Predicted | Observed | Predicted | Observed | Predicted |
| 1              | 13588.77 | 11810.39  | 25162.33 | 24259.36  | 47411.46 | 47719.62  | 112476.4 | 109093.1  |
| 2              | 30343.71 | 31260.73  | 53520.67 | 56020.48  | 74880.79 | 74446.85  | 187925   | 184097.5  |
| 3              | 24233.51 | 24653.79  | 40832.53 | 41595.58  | 66486.81 | 72049.57  | 157771.2 | 162763.3  |
| 4              | 24439.69 | 26946.42  | 47506.97 | 50945.74  | 68900.91 | 68373.19  | 166362.3 | 172044.8  |
| 5              | 12965.73 | 12843.02  | 27712.36 | 28565.82  | 50585.06 | 48300.64  | 129583.8 | 127370.2  |
| R <sup>2</sup> | 0.958713 |           | 0.946327 |           | 0.938551 |           | 0.943031 |           |
| Adeq Precision | 16.72297 |           | 13.59588 |           | 13.55452 |           | 13.18931 |           |

S-10. Verification studies for Box-Behnken design for LC-MS/MS conditions.

| Run          | SGP (arb) | ISGP<br>(arb) | AGP (arb) | CT<br>(°C) | VT<br>(°C) | CGP (mTorr) | SV<br>(V) | Area (EE2)<br>Predicted/ Observed |
|--------------|-----------|---------------|-----------|------------|------------|-------------|-----------|-----------------------------------|
| prediction-1 | 38        | 1.5           | 12        | 325        | 350        | 1.5         | 2750      | 20375/ 22623                      |
| prediction-2 | 34        | 0.5           | 19        | 340        | 400        | 2.2         | 3000      | 4941/ 3769                        |
| prediction-3 | 33        | 0.4           | 17        | 254        | 352        | 1.9         | 2740      | 38023/ 39840                      |
